# Supplementary material for: microRNA expression profiling identifies a four microRNA signature as a novel diagnostic and prognostic biomarker in triple negative breast cancers
Source: PubMed Central journal article supplement (PMC4012726; doi:10.18632/oncotarget.1682), 2014-01-21
Supplement: oncotarget-05-1174-s002.pdf [file oncotarget-05-1174-s002.pdf]

**Supplementary Table 1****Top 4 deregulated miRNAs in the comparison between CB and 5NP breast cancers**

| microRNA ID | Core Basal (CB)<br>mean | Five Negative<br>(5NP) mean | log2FC<br>CB vs 5NP | Adj-p-values<br>CB vs 5NP |
|-------------|-------------------------|-----------------------------|---------------------|---------------------------|
| hsa-miR-155 | 6.23                    | 6.99                        | 0.76                | 0.04                      |
| hsa-miR-493 | 6.47                    | 7.01                        | 0.54                | 0.01                      |
| hsa-miR-30e | 7.85                    | 7.24                        | -0.61               | 0.04                      |
| hsa-miR-27a | 8.58                    | 7.78                        | -0.80               | 0.01                      |

**Supplementary Table 2****Hazard ratios of protective and risky miRNAs**

| microRNA ID | Hazard Ratio | Type       |
|-------------|--------------|------------|
| hsa-miR-155 | 0.73         | Protective |
| hsa-miR-493 | 0.88         | Protective |
| hsa-miR-30e | 1.08         | Risky      |
| hsa-miR-27a | 1.09         | Risky      |
